# Supplementary material
Source: Royal Society of Chemistry journal article supplement (doi:10.1039/d6fo01089j)
Supplement: d6fo01089j1.pdf [file d6fo01089j1.pdf]

## Supplemental data

**Table S1** Standard of disease activity index (DAI) score.

**Table S2** Primers used for qRT-PCR.

**Fig. S1** EPS86 and SEPS86 improved the cognitive dysfunction caused by acute colitis in mice.

**Table S1** Standard of disease activity index (DAI) score.

| <b>DAI score</b> | <b>Body weight loss</b> | <b>Stool consistency</b> | <b>Fecal bleeding</b> |
|------------------|-------------------------|--------------------------|-----------------------|
| 0                | 0-1                     | Normal                   | Normal                |
| 1                | 1-5                     | Soft but still formed    | Reddish               |
| 2                | 5-10                    | Soft                     | Mild bleeding         |
| 3                | 10-15                   | Very soft and diarrhea   | Moderate bleeding     |
| 4                | 15-20                   | Diarrhea                 | Gross bleeding        |

**Table S2** Primers used for qRT-PCR.

| <b>Target genes</b> | <b>Primer sense (5'-3')</b>   | <b>Primer antisense (5'-3')</b> |
|---------------------|-------------------------------|---------------------------------|
| TNF- $\alpha$       | GCCTCTTCTCATTTCCTGCTTG<br>TGG | GTGGTTTGTGAGTGTGAGGGT<br>CTG    |
| IL-6                | CTTCTTGGGACTGATGCTGGT<br>GAC  | TCTGTTGGGAGTGGTATCCTC<br>TGTG   |
| Claudin-1           | GCTGGGTTTCATCCTGGCTTC<br>TC   | CCTGAGCGGTCACGATGTTGT<br>C      |
| Mucin-2             | CCTGAAGACTGTCGTGCTGT          | GGGTAGGGTCACCTCCATCT            |
| GAPDH               | AGAAGGTGGTGAAGCAGGCA<br>TC    | CGAAGGTGGAAGAGTGGGAG<br>TTG     |

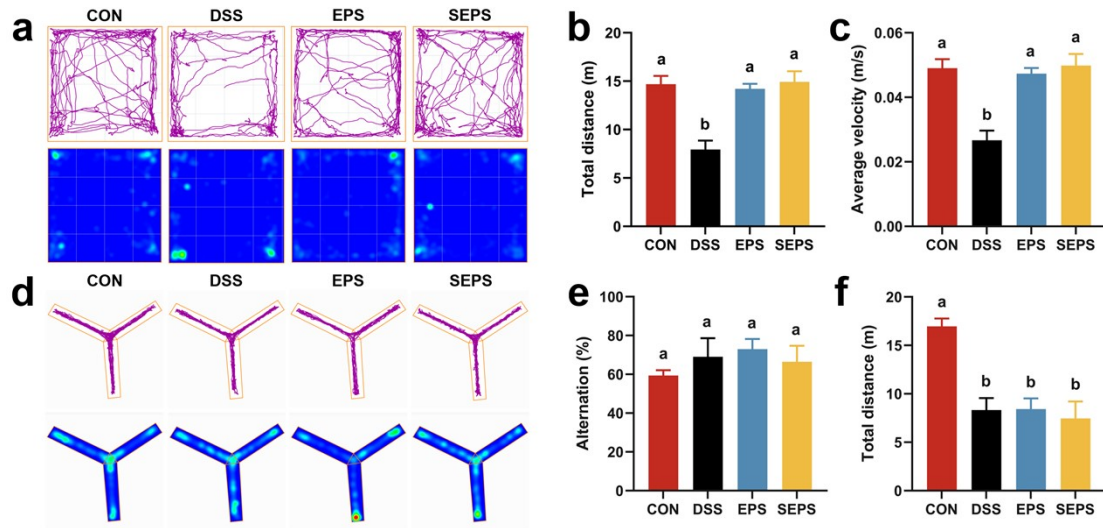

**Fig. S1** EPS86 and SEPS86 improved the cognitive dysfunction caused by acute colitis in mice. (a-c) For the open field test (OFT), representative movement tracks and heat maps are shown, and the total traveled distance and average movement velocity were measured. (d-f) For the Y-maze test, representative movement tracks and heat maps are shown, and the spontaneous alternation rate and total traveled distance were calculated. Data are expressed as mean  $\pm$  SEM ( $n = 6$ ). Different letters indicate significant differences among group ( $p < 0.05$ ).
